# Supplementary material
Source: Springer Nature journal article supplement (https://www.springermedizin.de/resource/supplementary/12985_2009_762_MOESM8_ESM.pdf/9608730)
Supplement: MOESM8 [file 9608730]

**(A)**

|          | NS6  |            |            |            |            |            |     |     |     |     |     |     |     |     |     |     |            |            |     |     |        |
|----------|------|------------|------------|------------|------------|------------|-----|-----|-----|-----|-----|-----|-----|-----|-----|-----|------------|------------|-----|-----|--------|
| FJ376622 | CAA  | CUA        | CCU        | AUA        | AUG        | UGC        | AAC | UGC | AUC | UAU | CAG | CUG | CAG | GCG | CUU | UAU | UCA        | UAU        | UGC | AAA | MuCoV  |
| EF584908 | UAA  | GUA        | UAU        | GUA        | AUG        | UGC        | AAC | UGC | CAU | CUG | CAG | CUG | CGA | GAU | UUA | UAU | AGA        | UUG        | UGC | AAU | ALCCoV |
| FJ376621 | UAA  | GUA        | UUU        | AUA        | AUG        | UGC        | AAC | UGC | CUU | UAC | CAG | GUU | AAA | GCA | CUU | GUU | GAA        | UAU        | AGC | AAA | ThCoV  |
| FJ376619 | CAA  | GUA        | CGU        | CUA        | AUG        | UGU        | AAC | UGC | AUU | AAG | CAA | GUU | GCA | GCA | UUA | GUA | <b>CAA</b> | <b>CAU</b> | UGC | AAG | BuCoV  |
| FJ376620 | CAA  | GUA        | CGU        | CUA        | AUG        | UGU        | AAC | UGC | AUU | AAG | CAA | GUU | GCA | GCA | UUA | GUA | <b>CAA</b> | <b>CAU</b> | UGC | AAG | BuCoV  |
|          | ORFX |            |            |            |            |            |     |     |     |     |     |     |     |     |     |     |            |            |     |     |        |
| FJ376622 | ACU  | CAU        | GUC        | AUA        | <b>CAA</b> | <b>CCG</b> | GAU | GAC | AUC | UUU | GAG | CUU | UGC | GAC | ACU | CUU | GUU        | AAG        | CCU | CGU | MuCoV  |
| EF584908 | AAG  | CGG        | <b>CAC</b> | <b>AUC</b> | <b>AGA</b> | AGA        | GAG | GAU | GUU | CCU | GAG | CUU | AUU | GAC | CCU | CAC | GUU        | AAA        | ACU | CGC | ALCCoV |
| FJ376621 | ---  | <b>ACA</b> | <b>CAU</b> | GGA        | AAA        | ---        | ACA | GAU | GUU | UUG | GAG | CUU | CUU | GAC | CCA | CUU | GUC        | AAG        | ACU | CGG | ThCoV  |
| FJ376619 | GCA  | ACC        | AAU        | AUA        | CAU        | CCU        | AGU | GAU | GUU | UUG | GAG | CUU | AAU | GAC | CCG | CUU | GUG        | GUU        | GUU | AAA | BuCoV  |
| FJ376620 | GCA  | ACC        | AAU        | AUA        | CAU        | CCU        | AGU | GAU | GUU | UUG | GAG | CUU | AAU | GAC | CCG | CUU | GUG        | GCU        | GUU | AAA | BuCoV  |

**(B)**

FJ376620 (nt 23877..24140) Bulbul coronavirus HKU11-796  
 MFWSLMTRLW LLNVLLIRLF WLLMQIQLHL VYYLGKYLMS VSLCSLNMVM FMEKIFSSDH LYKLYLKKKL QIKALTPNQY  
 VCTSCPHN
